# Supplementary material
Source: Springer Nature journal article supplement (https://www.springermedizin.de/resource/supplementary/13024_2011_224_MOESM10_ESM.pdf/9643690)

**CRMP2****HIV+ control**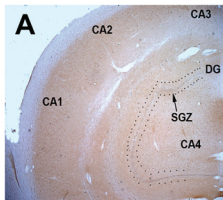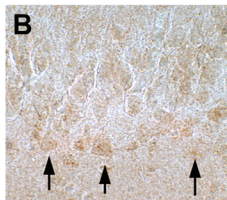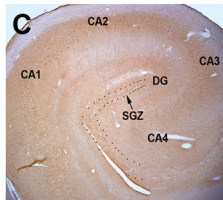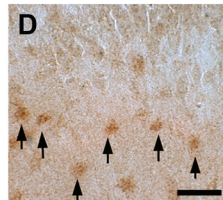**GCL****SGZ**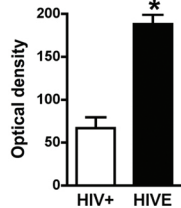**pSer-CRMP2****HIVE**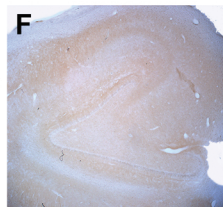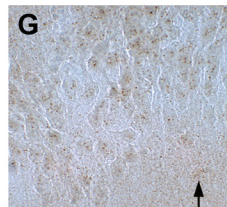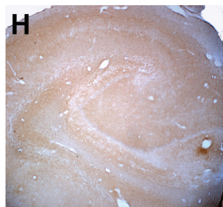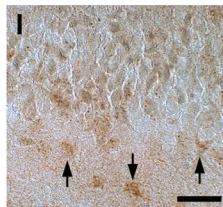**GCL****SGZ**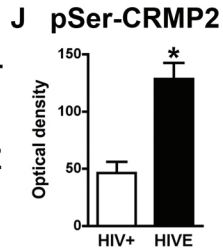

Supplement: MOESM10 [file 9643690]
